# Supplementary material
Source: HighWire-hosted journal article supplement (https://www.cmaj.ca/highwire/filestream/59282/field_highwire_adjunct_files/0/184_17.pdf)
Supplement: 184_17.pdf [file 184_17.pdf]

## ÉDITORIAL

# Les travailleurs de la santé doivent protéger les patients contre la grippe en se faisant vacciner chaque année

Ken Flegel MDCM MSc

Pour la version anglaise de l'éditorial, veuillez consulter la page 1873.

Aucun médecin sensé ne causerait sciemment un préjudice à un patient ou omettrait de poser un acte essentiel qui causerait un préjudice à un patient. Le principe de l'exercice de la médecine est enchâssé dans le dicton latin *primum non nocere* (d'abord, ne causer aucun préjudice). Or, lorsque de 55 % à 65 % des médecins ne se font pas vacciner contre la grippe saisonnière annuelle<sup>1</sup>, ils exposent leurs patients au risque de mourir de la grippe<sup>2</sup>. Au Canada, le taux annuel d'infection par la grippe atteint en moyenne de 5 % à 10 % de la population. Il en découle quelque 20 000 hospitalisations et de 4000 à 8000 décès sont attribués à la grippe<sup>3</sup>. Chaque saison, 20 % des travailleurs de la santé attrapent la grippe et de 28 % à 59 % des jeunes adultes en santé qui l'attrapent ont une infection asymptomatique ou sous-clinique. Certains d'entre eux peuvent excréter le virus jusqu'à 1 jour avant l'apparition des symptômes<sup>4</sup>. Il est temps que tous ceux et celles qui œuvrent dans un établissement de santé se fassent vacciner.

Les bienfaits de la vaccination chez les travailleurs de la santé sont clairs. Les taux d'efficacité atteignent environ 86 % lorsque la souche en circulation et celle du vaccin sont bien jumelées<sup>4</sup>. Il y a moins de grippe (et de mortalité) chez les patients et les membres du personnel et moins de temps perdu en congés de maladie. Un aperçu de 4 essais randomisés a révélé que le taux global de mortalité saisonnière diminuait de 5 % à 20 % chez les bénéficiaires d'établissements de soins chroniques où le taux de vaccination du personnel variait de 51 % à 70 % chez les groupes visés par une intervention, contre 3,5 % à 32 % chez les groupes témoins<sup>5</sup>. La plupart des patients des hôpitaux de soins actifs sont plus malades que ceux qui étaient visés par ces études et sont moins capables de résister à une nouvelle infection ou de produire une réaction immunitaire. De plus, une analyse coût-avantage effectuée dans l'optique d'un système de santé a révélé que chaque tranche de 1000 \$US consacrés à la vaccination des travailleurs de la santé permet d'éviter des coûts de 1600 \$US<sup>6</sup>.

Imposer une vaccination obligatoire peut être considéré comme une mesure douteuse sur le plan de l'éthique parce qu'elle empiète sur l'autonomie d'une personne. Dans le cas de la vaccination contre la grippe, toutefois, l'autonomie des travailleurs de la santé entre en conflit avec le meilleur intérêt

du patient. Les patients doivent passer en premier, ce qui a déjà été établi dans des situations semblables. Par exemple, un chirurgien infecté par le VIH ou un virus de l'hépatite ne sera pas autorisé à opérer.

La crainte d'être malade ou d'avoir la grippe, la croyance selon laquelle « on n'a jamais la grippe », que le vaccin n'agira pas ou qu'il n'a pas fait ses preuves pour protéger les patients sont au nombre des obstacles à la vaccination annuelle. Il appert maintenant qu'aucune de ces raisons ne tient pas la route. Le virus inactivé utilisé ne peut causer la grippe<sup>6</sup>. Une réaction locale, une fièvre de faible grade et le nez qui coule sont les principaux effets indésirables. Des complications sérieuses comme le syndrome de Guillain-Barré se produisent à un taux qui équivaut à peu près au taux annuel de base de 1 pour 100 000 et dans la production du vaccin, on évite en général les souches qui pourraient provoquer le syndrome de Guillain-Barré<sup>6,7</sup>.

Pour justifier la vaccination obligatoire, il doit y avoir une éclosion de maladie grave; des taux d'immunité faibles; un vaccin efficace, sans danger et disponible; et une faible absorption du vaccin<sup>8</sup>. Ces conditions semblent respectées dans le cas de la grippe saisonnière annuelle. Il serait possible d'accorder des exemptions pour des contre-indications médicales ou des convictions religieuses ou philosophiques profondes.

On a fait l'essai de campagnes et de promotions; elles ont produit une augmentation variant de 22 % à 52 % seulement des taux de vaccination<sup>1</sup>. Des programmes obligatoires pour les travailleurs de la santé ont produit des taux de vaccination de plus de 95 % dans l'exemple de leadership donné par un grand nombre d'hôpitaux d'enseignement de Philadelphie, ainsi que par une foule d'établissements américains des secteurs public et privé<sup>5</sup>. Santé publique Ontario a modifié récemment ses lignes directrices afin de recommander un programme obligatoire<sup>9</sup>. Le taux de participation doit dépasser les 90 % pour éviter l'importation de la grippe et en interrompre la transmission au sein d'un hôpital.

Nos écoles ont donné l'exemple. Au cours des épidémies de rougeole, l'accès aux écoles a été refusé avec succès aux enfants et aux membres du personnel non vaccinés. Le moment est venu pour les établissements de santé d'exiger que tous les travailleurs de la santé soient vaccinés. La vie de nos patients en dépend.

## Références

1. Lam P-P, Chambers LW, Pierrynowski MacDougall DM, et al. Seasonal influenza vaccination campaigns for health care personnel: systematic review. *CMAJ* 2010; 182:E542-8.
2. Behrman AJ, Caplan AL, Coffin SE. Doctors choosing not to be vaccinated is choosing to do harm. *BMJ* 2011;343:d7198.
3. Agence de la santé publique du Canada. Influenza (grippe) — le vaccin antigrippal. Ottawa (Ont.) : L'Agence. Disponible : [www.phac-aspc.gc.ca/im/iif-vcg/index-fra.php](http://www.phac-aspc.gc.ca/im/iif-vcg/index-fra.php) (consulté le 12 octobre 2012).
4. Thomas RE, Jefferson T, Demicheli V, et al. Influenza vaccination for healthcare workers who work with the elderly [revue]. *Cochrane Database Syst Rev* 2006;(3): CD005187.
5. Talbot TR, Babcock H, Caplan AL, et al. Revised SHEA position paper: influenza vaccination of healthcare personnel. *JSTOR. Infect Control Hosp Epidemiol* 2010; 31: 987-95-23.
6. Steckel CM. Mandatory influenza immunization for health care workers — an ethical discussion. *AAOHN J* 2007;55:34-9.
7. Juurlink DN, Stukel TA, Kwong J, et al. Guillain-Barré syndrome after influenza vaccination in adults: a population-based study. *Arch Intern Med* 2006;166:2217-21.
8. Salmon DA, Teret SP, MacIntyre CR, et al. Compulsory vaccination and conscientious or philosophical exemptions: past, present and future. *Lancet* 2006;367:436-42.
9. Comité consultatif provincial des maladies infectieuses. *Pratiques exemplaires pour les programmes de prévention et de contrôle des infections en Ontario dans tous les établissements de soins de santé*. 3e éd. Toronto (Ont.) : Santé publique Ontario; 2012. Disponible : <http://www.oahpp.ca/fr/resources/pidac-knowledge/best-practice-manuals/FR-infection-prevention-and-control-programs-in-ontario-in-all-health-care-settings-3rd-edition.html> (consulté le 12 octobre 2012).

**Intérêts concurrents :** Voir [www.cmaj.ca/site/misc/cmaj\\_staff.xhtml](http://www.cmaj.ca/site/misc/cmaj_staff.xhtml)

**Affiliations :** Ken Flegel est rédacteur associé principal, *JAMC*

**Correspondance :** Rédacteur en chef du *JAMC*, pubs @cmaj.ca

## RÉSUMÉS DE RECHERCHE

# Effet d'un programme de soins obstétricaux interdisciplinaires en collaboration sur l'issue périnatale

Susan J. Harris MD, Patricia A. Janssen PhD, Lee Saxell MA, Elaine A. Carty MSN, George S. MacRae MN, Karen L. Petersen BEd

Pour la version anglaise de ce résumé, veuillez consulter la page 1885.

**Intérêts concurrents :**

Aucun déclaré.

Cet article a été revu par les pairs.

**Correspondance à :**

Patricia A. Janssen,  
patti.janssen@ubc.ca

**Contexte :** Le nombre de médecins qui offrent des soins obstétricaux au Canada est en baisse et le taux de césariennes augmente. Nous avons évalué les effets sur l'issue périnatale d'un programme interdisciplinaire conçu pour promouvoir l'accouchement naturel et encourager la participation active des femmes et de leurs familles aux soins obstétricaux.

**Méthodes :** Nous avons réalisé une étude de cohorte rétrospective regroupant 1238 femmes qui ont participé au *South Community Birth Program* à Vancouver au Canada entre avril 2004 et octobre 2010. Le programme offre des soins interdisciplinaires complets, prodigués en collaboration par des médecins de famille, des sages-femmes, des infirmières en santé communautaire et des doulas, à une population multiethnique à faible revenu. Un groupe témoin assorti selon la proximité du lieu de résidence, le nombre de grossesses et l'âge gestationnel au moment de l'accouchement a inclus 1238 femmes qui recevaient des soins standard dans des pratiques de médecine familiale communautaire, d'obstétrique et de sages-femmes. Le principal paramètre était la proportion de femmes ayant subi une césarienne.

**Résultats :** Comparativement aux femmes qui recevaient les soins standard, celles qui partici-

paient au programme étaient plus susceptibles d'accoucher avec l'aide d'une sage-femme (41,9 % c. 7,4 %,  $p < 0,001$ ) plutôt que d'un obstétricien (35,5 % c. 69,6 %,  $p < 0,001$ ). Les participantes au programme étaient moins susceptibles que les témoins de subir une césarienne (risque relatif [RR] 0,76, intervalle de confiance [IC] à 95 % 0,68–0,84) et, parmi celles qui avaient déjà accouché par césarienne, elles étaient plus susceptibles de planifier un accouchement naturel (RR 3,22, IC à 95 % 2,25–4,62). La durée du séjour hospitalier a été plus brève dans le groupe du programme, tant chez les mères (moyenne  $\pm$  écart-type 50,6  $\pm$  47,1 c. 72,7  $\pm$  66,7 h,  $p < 0,001$ ) que chez les nouveau-nés (47,5  $\pm$  92,6 c. 70,6  $\pm$  126,7 h,  $p < 0,001$ ). Les femmes inscrites au programme étaient plus susceptibles que les témoins assortis d'allaiter exclusivement au moment de leur congé (RR 2,10, IC à 95 % 1,85–2,39).

**Interprétation :** Les femmes qui ont participé au programme de soins obstétricaux interdisciplinaires en collaboration étaient moins susceptibles de subir une césarienne, leur séjour hospitalier a été en moyenne plus court et elles étaient plus susceptibles d'allaiter exclusivement comparativement aux femmes qui avaient reçu les soins standard.
